# Supplementary material
Source: PubMed Central journal article supplement (PMC1533792)

# Series 3

W12p10<sup>EPI</sup>

W12p14

W12p18

W12p22

W12p26

W12p30

12.5

25

50

100

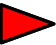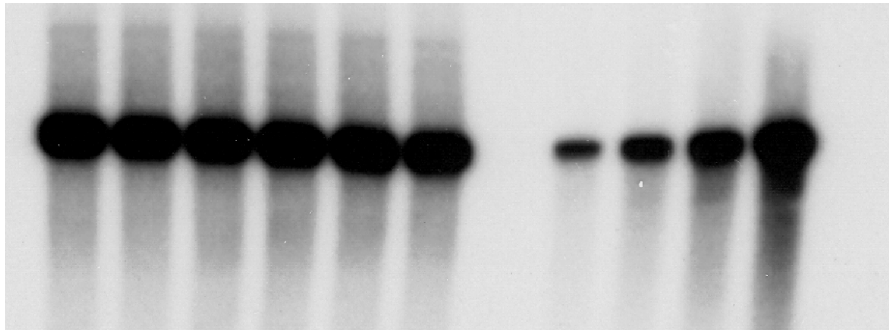

◀ 8kb

Supplement: pnas_0600078103_1.pdf [file pnas_0600078103_1.pdf]

**A****HPV16 genome**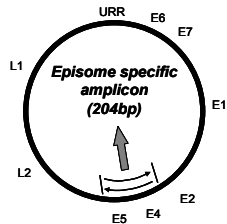**Selected HPV16 integrant in Series 1**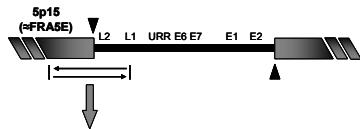

**Integrand specific  
amplicon  
(588bp)**

**B**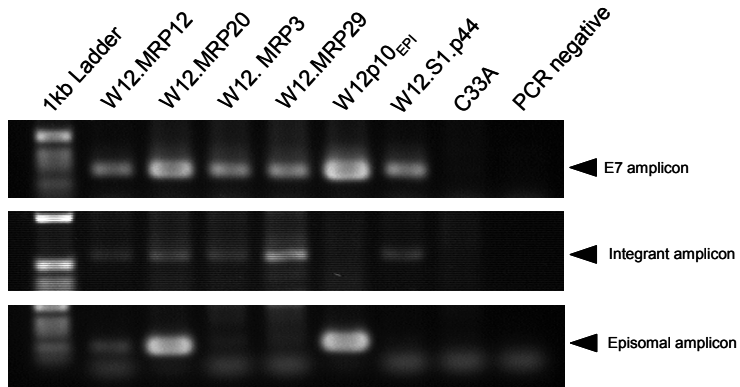

Supplement: pnas_0600078103_2.pdf [file pnas_0600078103_2.pdf]

Normalised intensity (log scale)

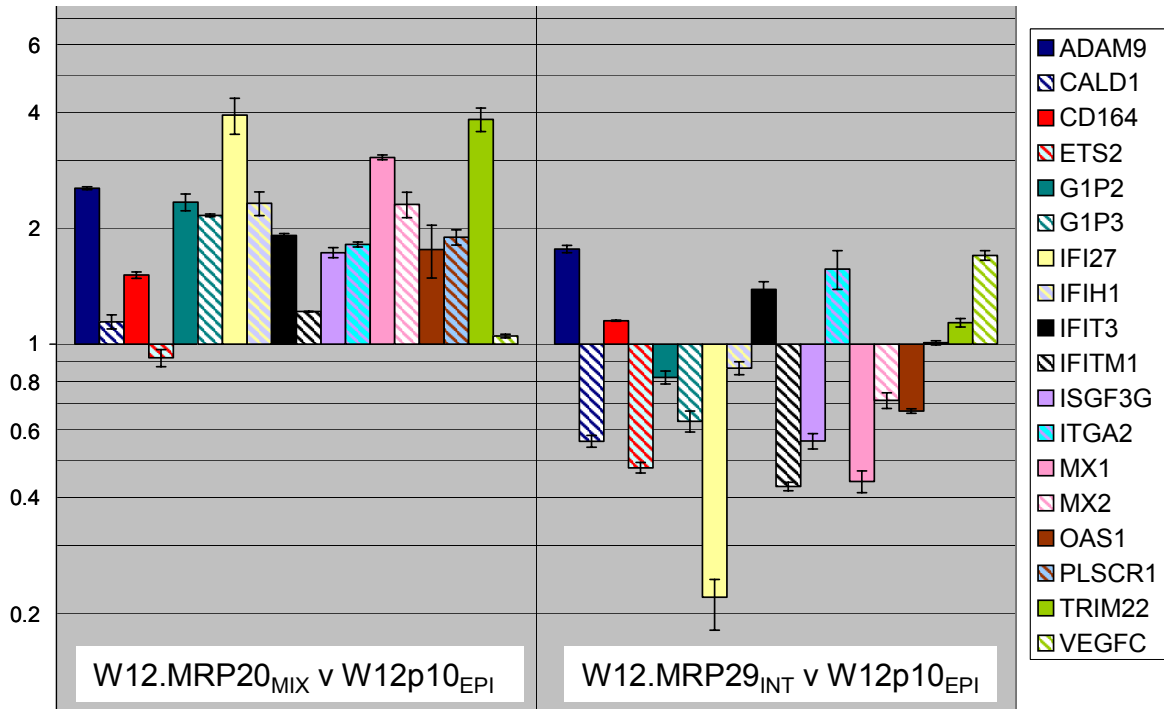

Supplement: pnas_0600078103_3.pdf [file pnas_0600078103_3.pdf]

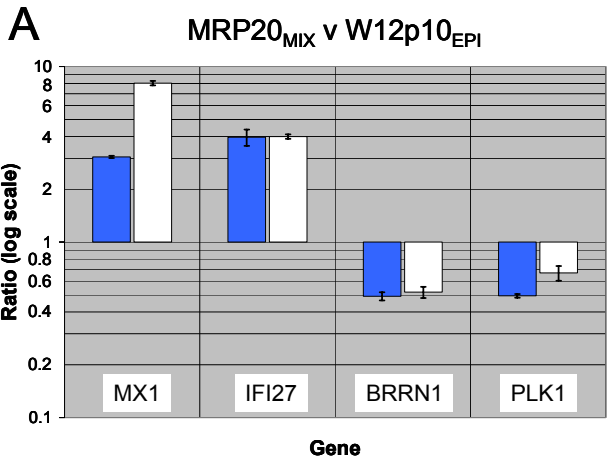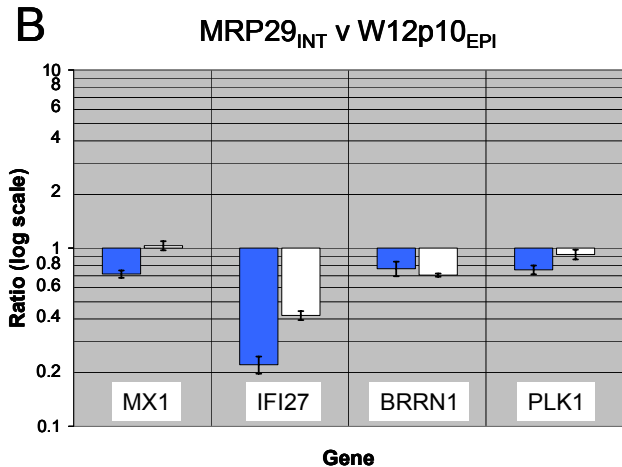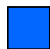

Array Mean

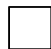

QPCR Mean

Supplement: pnas_0600078103_4.pdf [file pnas_0600078103_4.pdf]

**A****W12.MRP20<sub>MIX</sub>**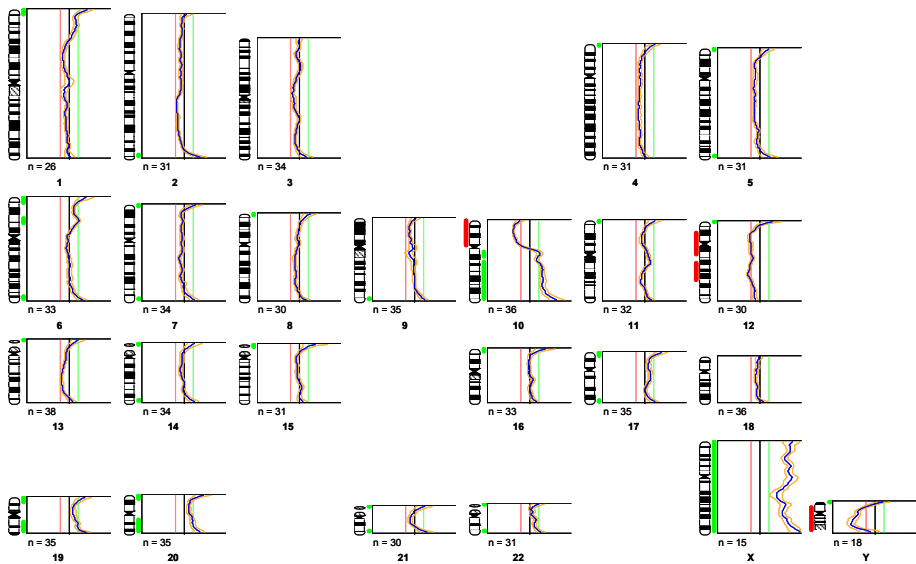**B****W12.MRP29<sub>INT</sub>**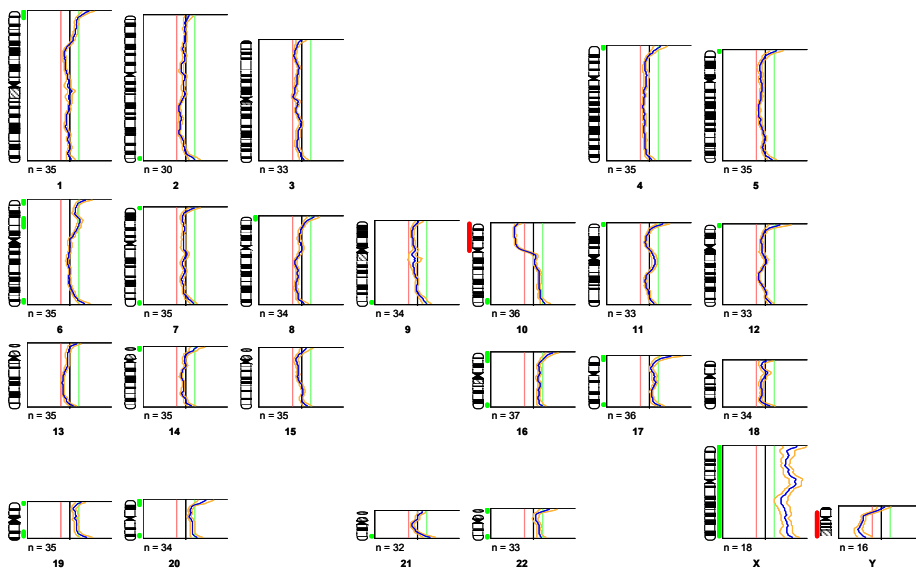

Supplement: pnas_0600078103_5.pdf [file pnas_0600078103_5.pdf]
